# Supplementary material for: Isolation and functional characterization of CE1 binding proteins
Source: Springer Nature journal article supplement (doi:10.1186/1471-2229-10-277), 2010-12-01

**A**

Ler #43 #60

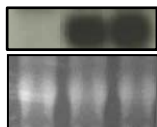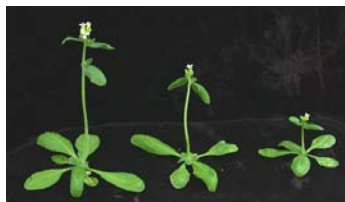

Ler RL#43 RL#60

**B**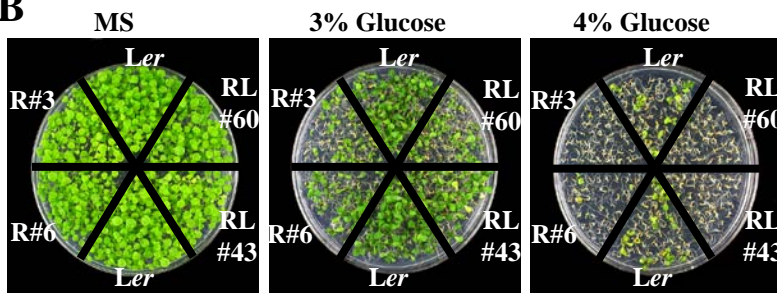**C**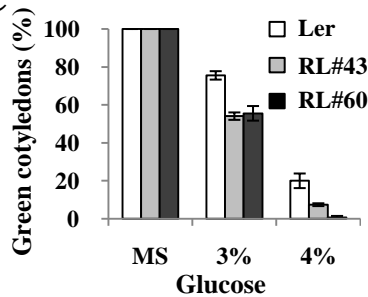**D**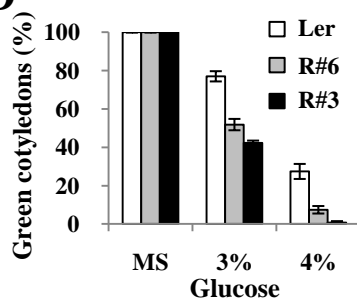**E**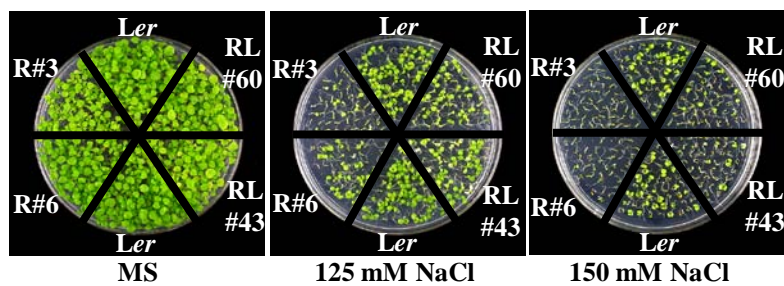**F**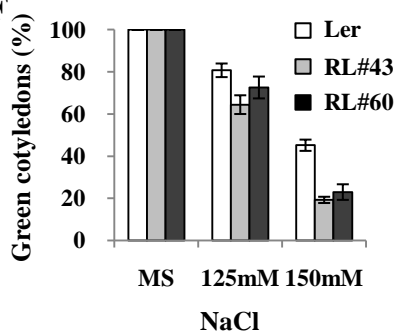**G**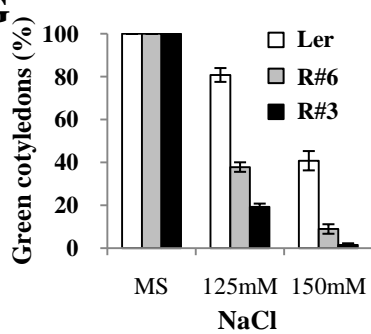

Supplement: 12870_2010_771_MOESM7_ESM.pdf [file 12870_2010_771_MOESM7_ESM.pdf]
