# Supplementary material for: Isolation and functional characterization of CE1 binding proteins
Source: Springer Nature journal article supplement (doi:10.1186/1471-2229-10-277), 2010-12-01

*COR15A*

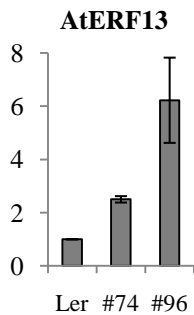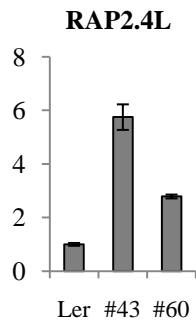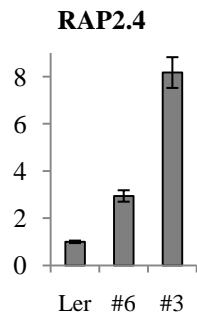

*ADHI*

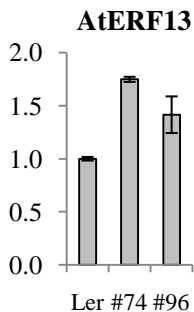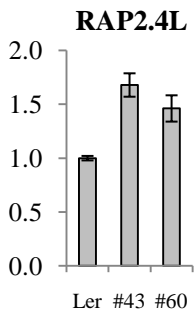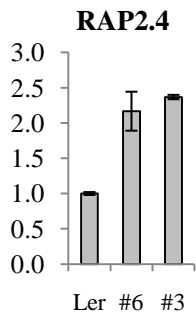

*RAB18*

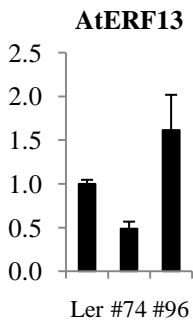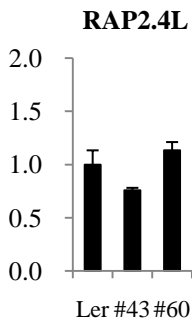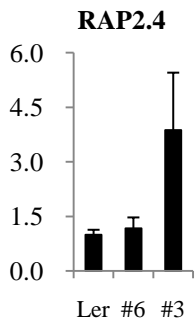

Supplement: 12870_2010_771_MOESM8_ESM.pdf [file 12870_2010_771_MOESM8_ESM.pdf]
